# Supplementary material
Source: MDPI journal article supplement (https://www.mdpi.com/2673-4591/6/1/4)
Supplement: s1 [file s1]

International Symposium on Sensor Science, I3S 2021, Dresden

# Ultra-wideband localization of pulmonary nodules during thoracoscopic surgery

Alberto Battistel, Knut Möller

Institute of Technical Medicine (ITeM), Furtwangen University, Germany

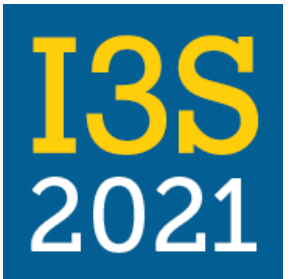

- 12% of total tumor cases worldwide<sup>1</sup>
- 5-year survival rate less than 20%<sup>2</sup>
- Leading cause of tumor death<sup>3</sup>

<sup>1</sup>F. Bray, J. Ferlay, I. Soerjomataram, R. L. Siegel, L. A. Torre, and A. Jemal, CA Cancer J Clin, 2018

<sup>2</sup>R. L. Siegel, K. D. Miller, and A. Jemal, CA: A Cancer Journal for Clinicians, 2016

<sup>3</sup>“Worldwide cancer data,” World Cancer Research Fund, 2018. (accessed Jun. 23, 2020).

**Before Surgery**

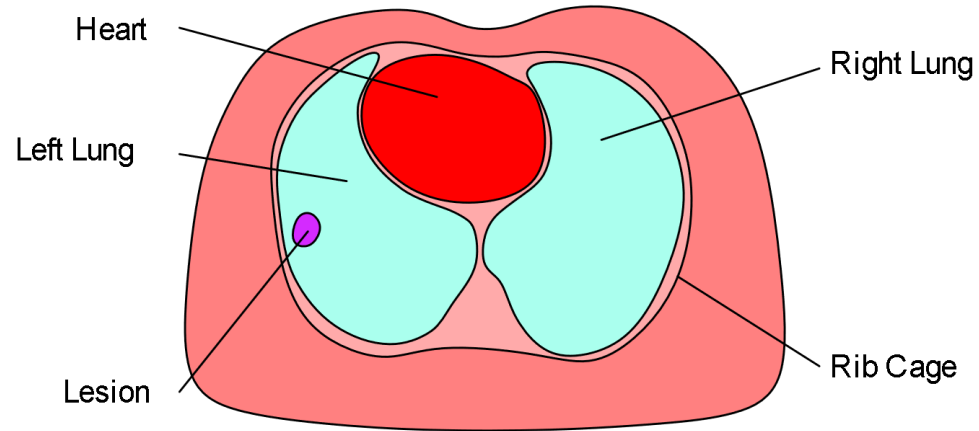

**During Surgery**

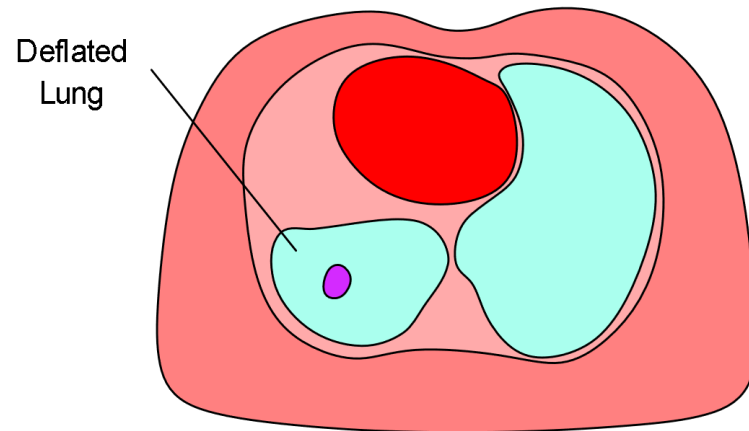

- **Pre-operation:**
  - marked by CT guide
- **Intraoperative imaging:**
  - ultrasonography,
  - fluoroscopy,
  - molecular imaging

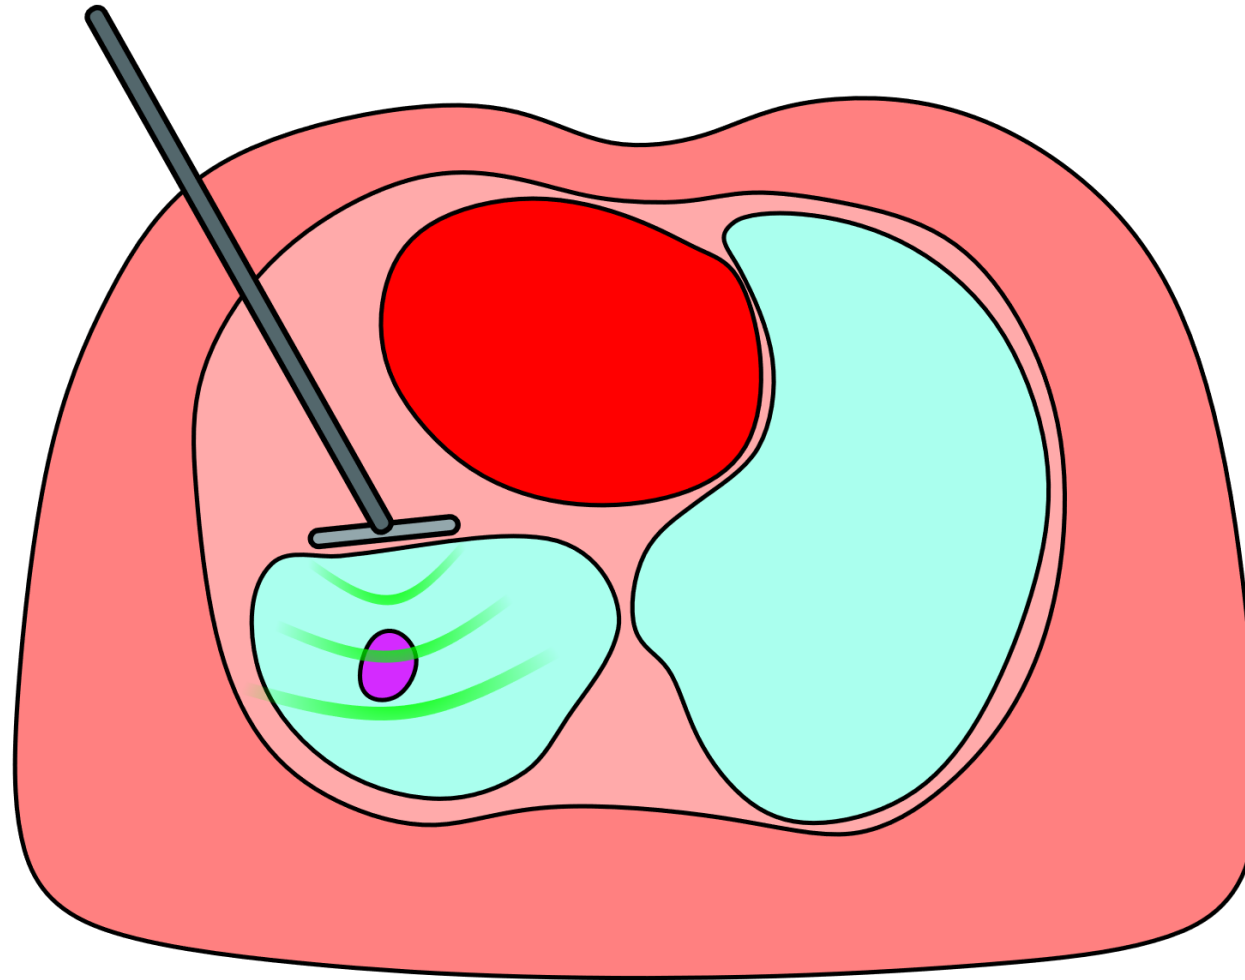

## **Microwave imaging:**

- Used for breast cancer
- Miniaturized electronics
- No ionizing radiation

## Dielectric properties of lung tissue<sup>1</sup>

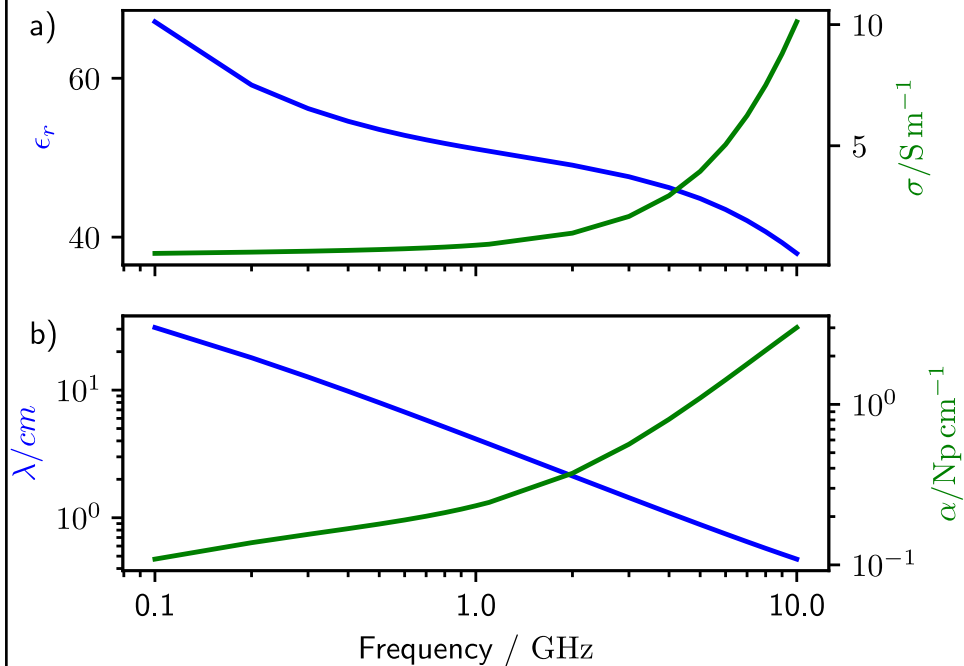

## Computational domain<sup>2</sup>

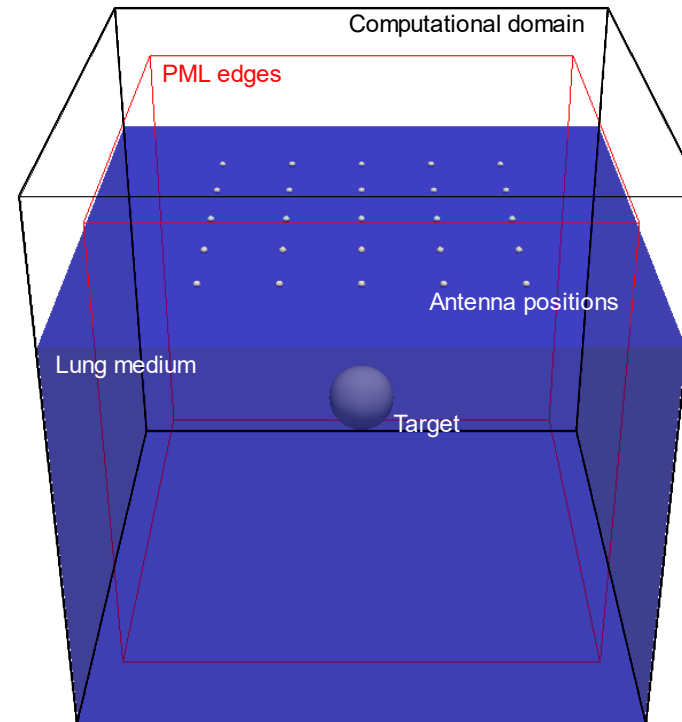

Finite Difference Time Domain (FDTD):  
GPRMax

10 frequencies (500 MHz – 5 GHz)

Target:

- 1 cm in diameter
- 6 target depths (1 – 6 cm)
- $\epsilon_r = 3 \cdot \epsilon_{rLung}$
- $\sigma = 2 \cdot \sigma_{Lung}$

<sup>1</sup>IT'IS Foundation, "Tissue Properties Database V4.0." 2018

<sup>2</sup>A. Battistel, P. P. Pott, and K. Möller, *Applied Sciences*, 2021

Waveform<sup>1</sup>

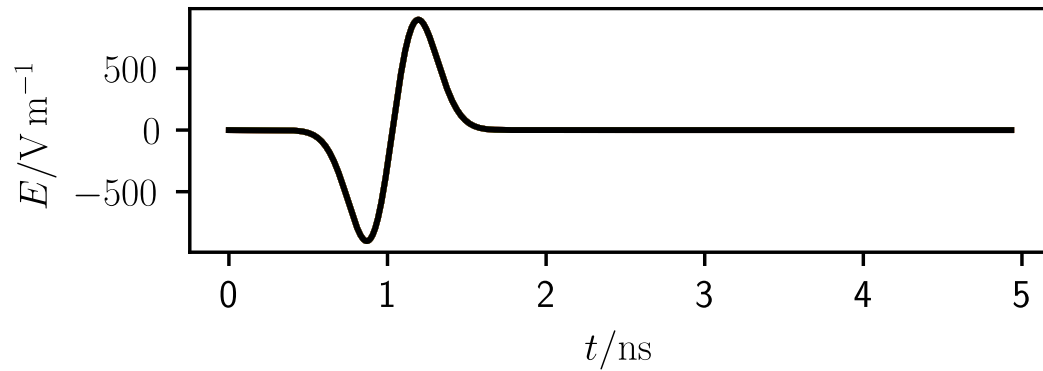

Confocal image<sup>2</sup>

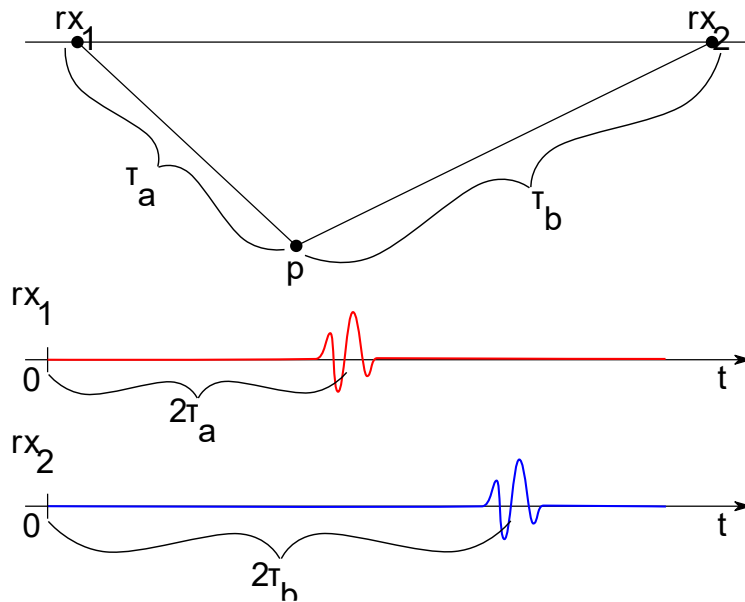

Calibrated waveforms<sup>1</sup>

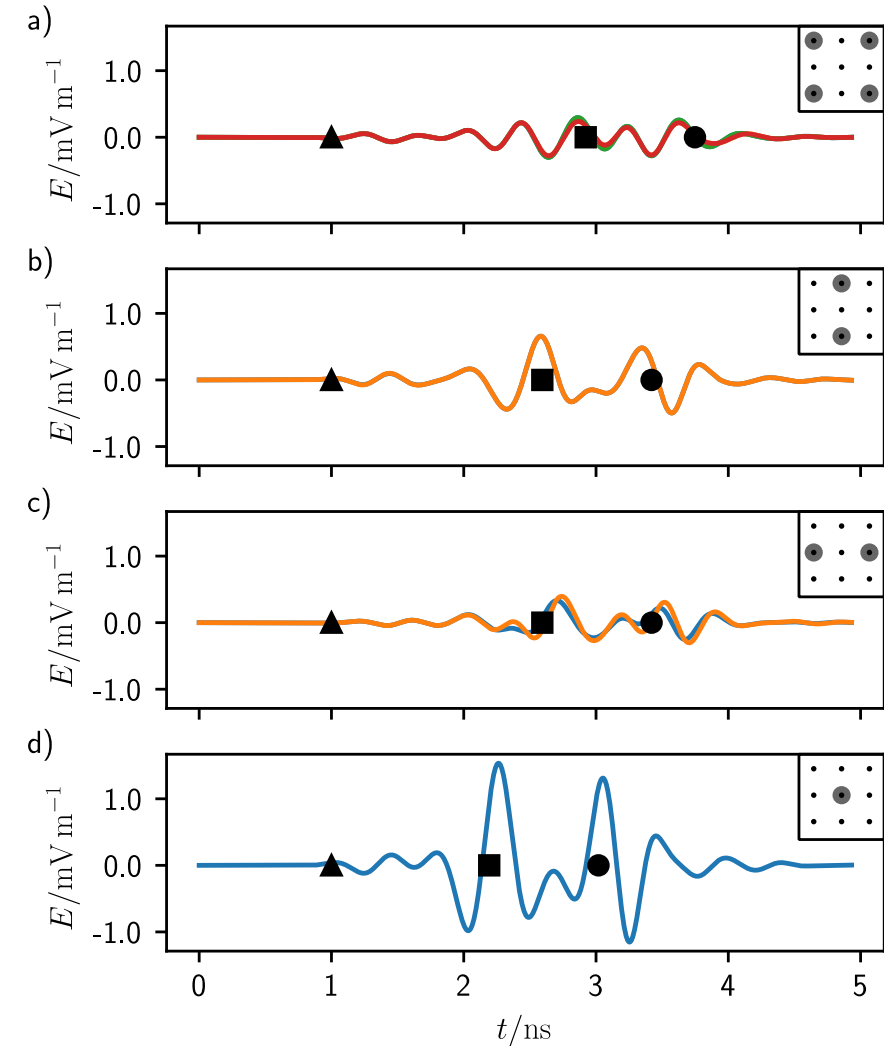

<sup>1</sup>A. Battistel, P. P. Pott, and K. Möller, Applied Sciences, 2021

<sup>2</sup>A. Battistel and K. Möller, in 8th European Medical and Biological Engineering Conference, Cham, 2021

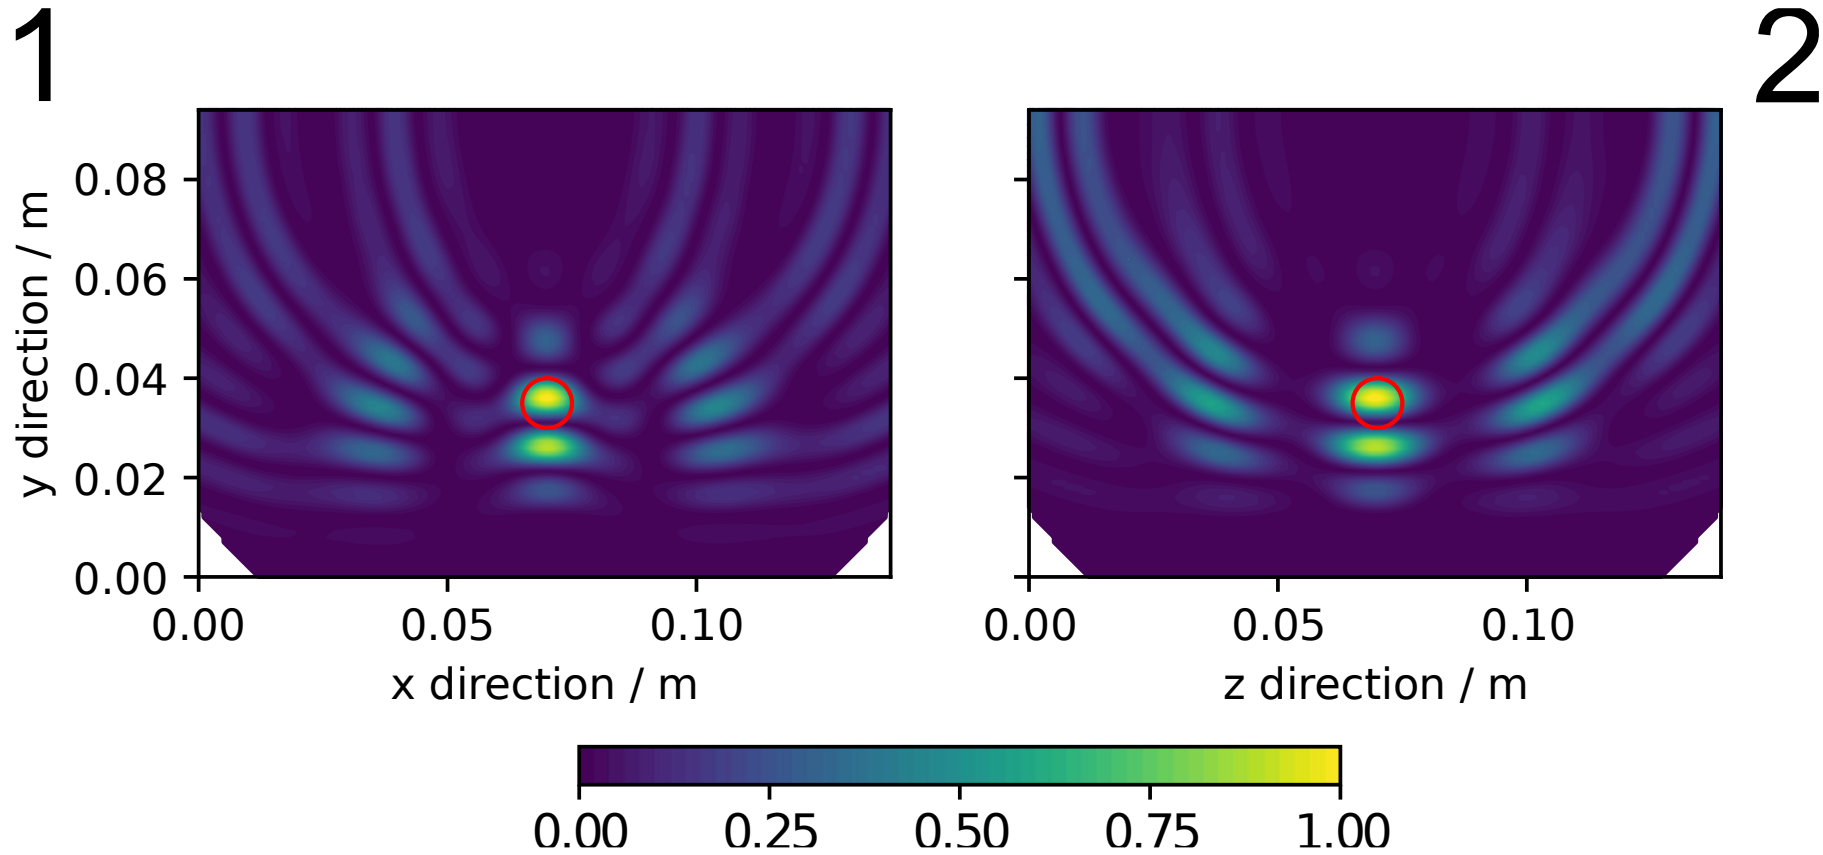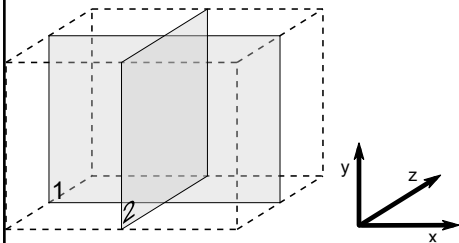

## Ghost artifact

Tumor depth 4.0 cm at 2.0 GHz

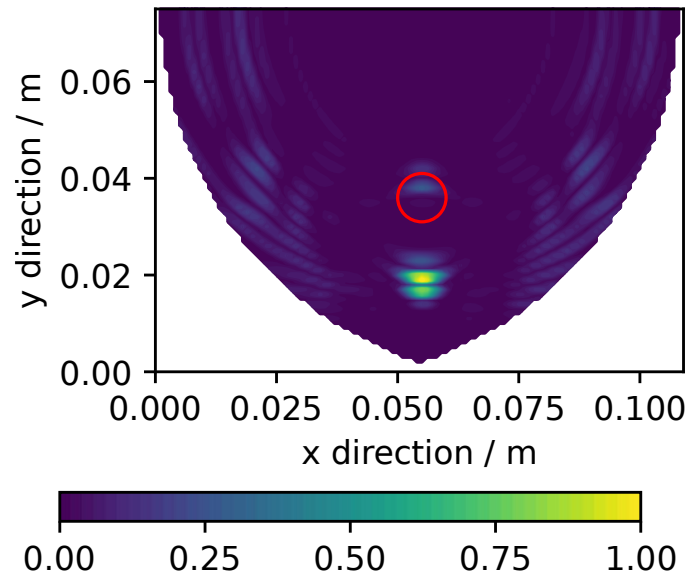

## Smaller target

Tumor depth 4.0 cm at 5.0 GHz

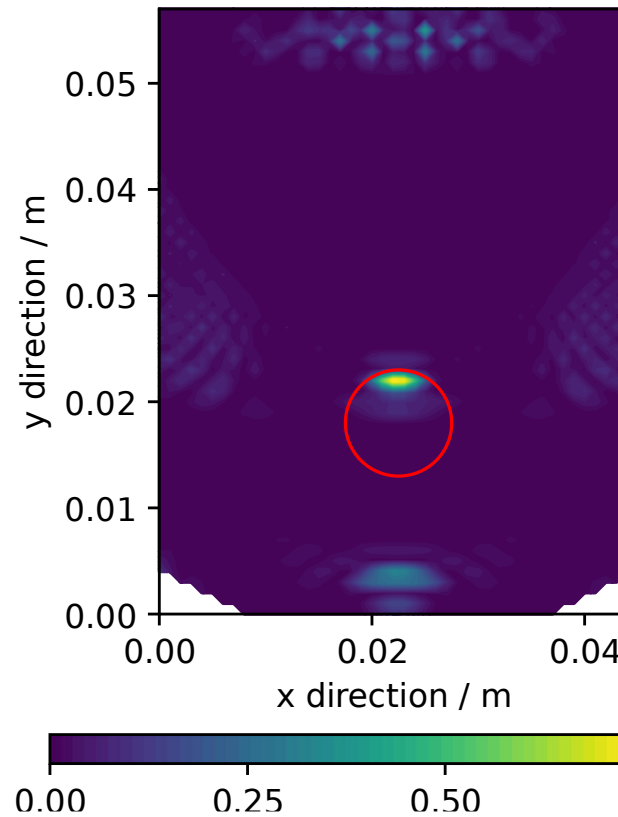

## No target

Tumor depth 5.0 cm at 5.0 GHz

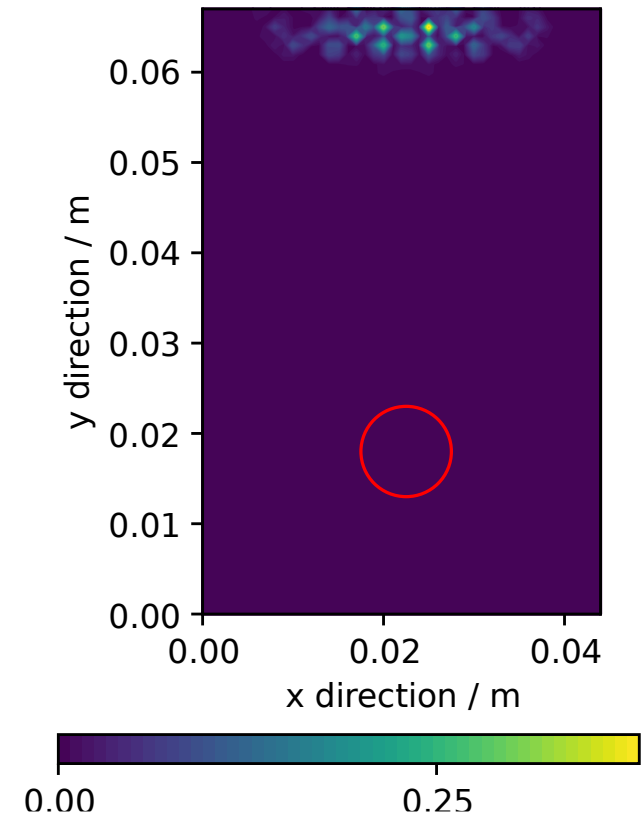



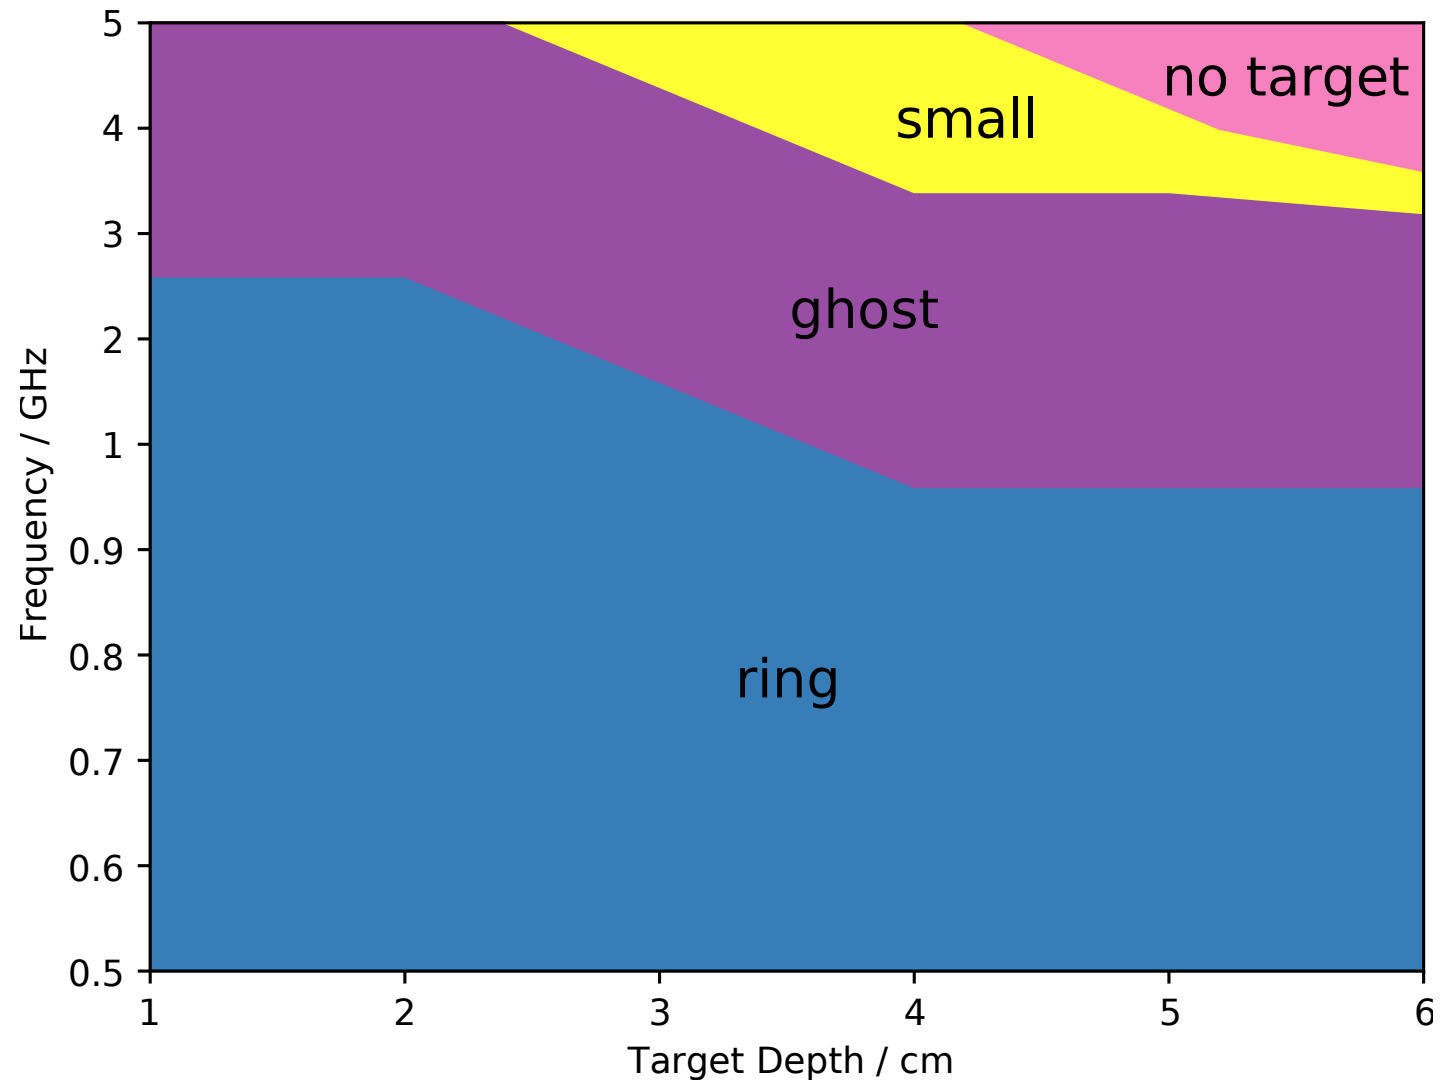

$$R = \frac{\text{avg. pixel intensity at target}}{\text{avg. pixel intensity outside target}}$$

$R \gg 10$  **good** localization

$R \approx 1$  **bad** localization

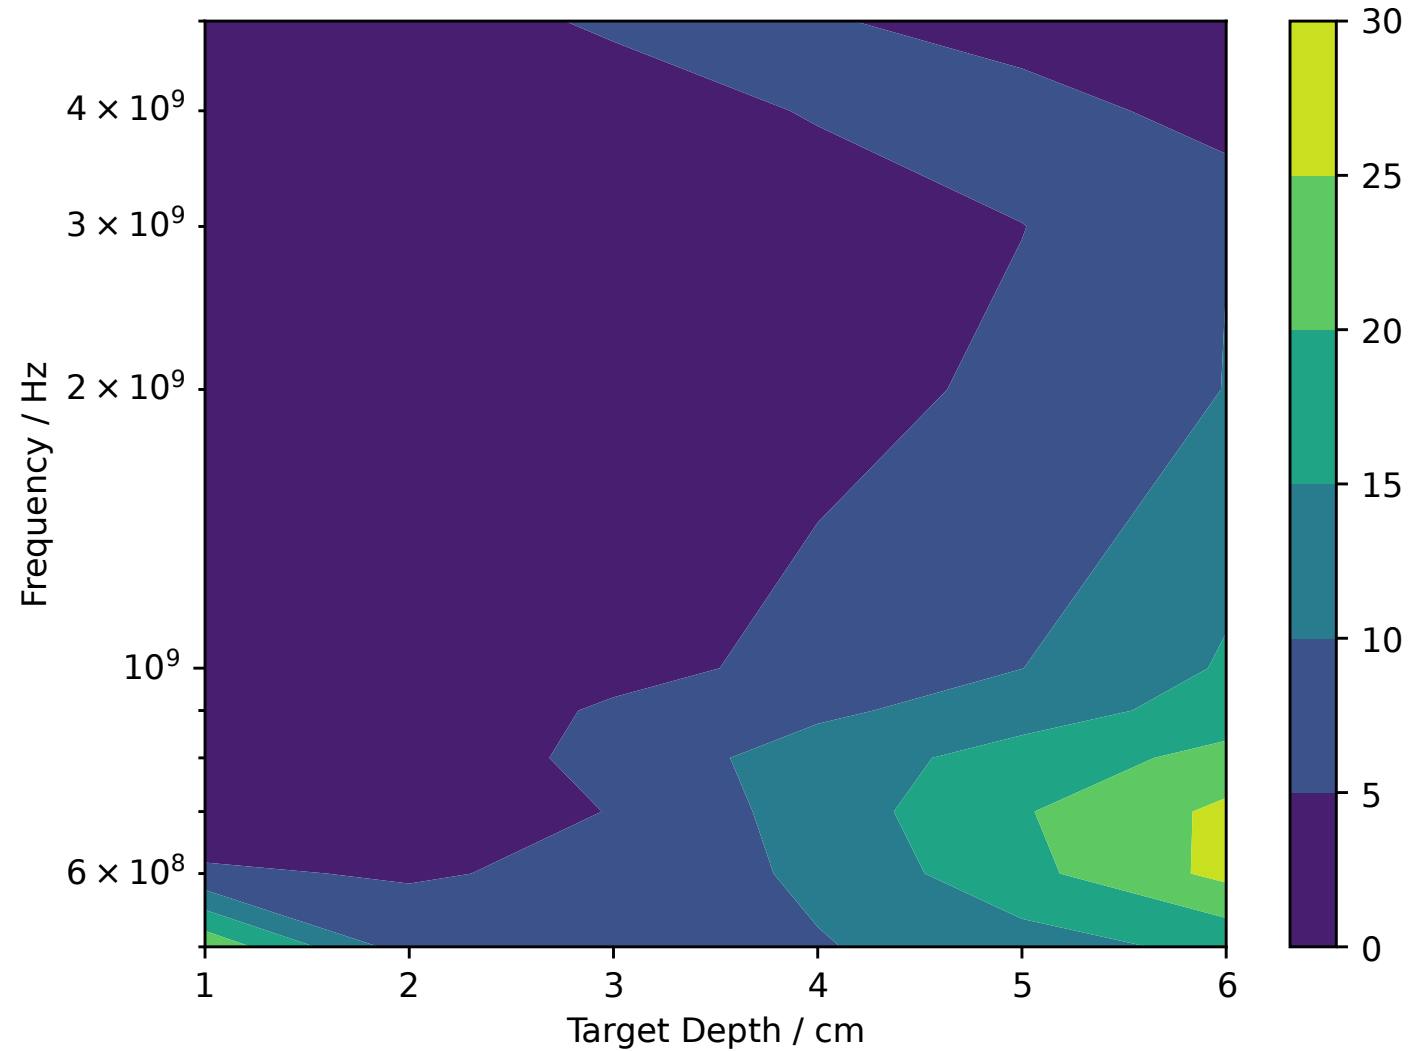

$$R = \frac{\text{avg. pixel intensity at target}}{\text{avg. pixel intensity outside target}}$$

$R \gg 10$  **good** localization

$R \approx 1$  **bad** localization

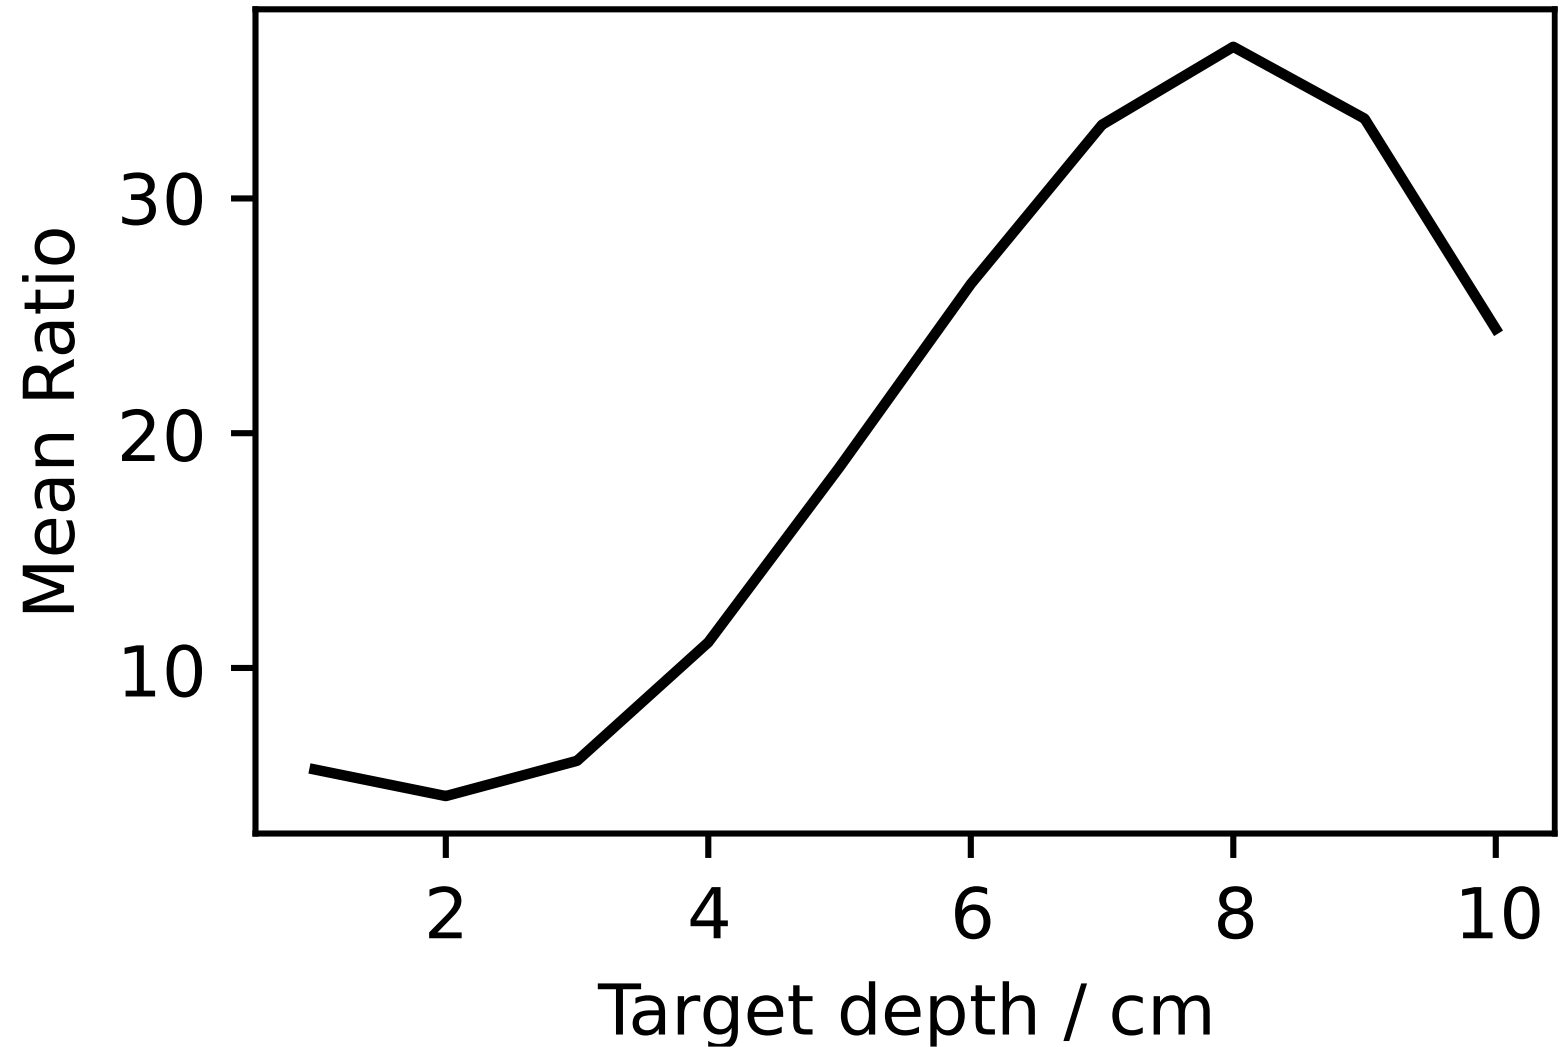

- Artifacts are present
- Low frequencies ( $< 1$  GHz) are better
- Shallow targets are a problem
- At low frequency a target is “visible” up to 10 cm of depth

## Institute of Technical Medicine (ITeM), Furtwangen University, Germany

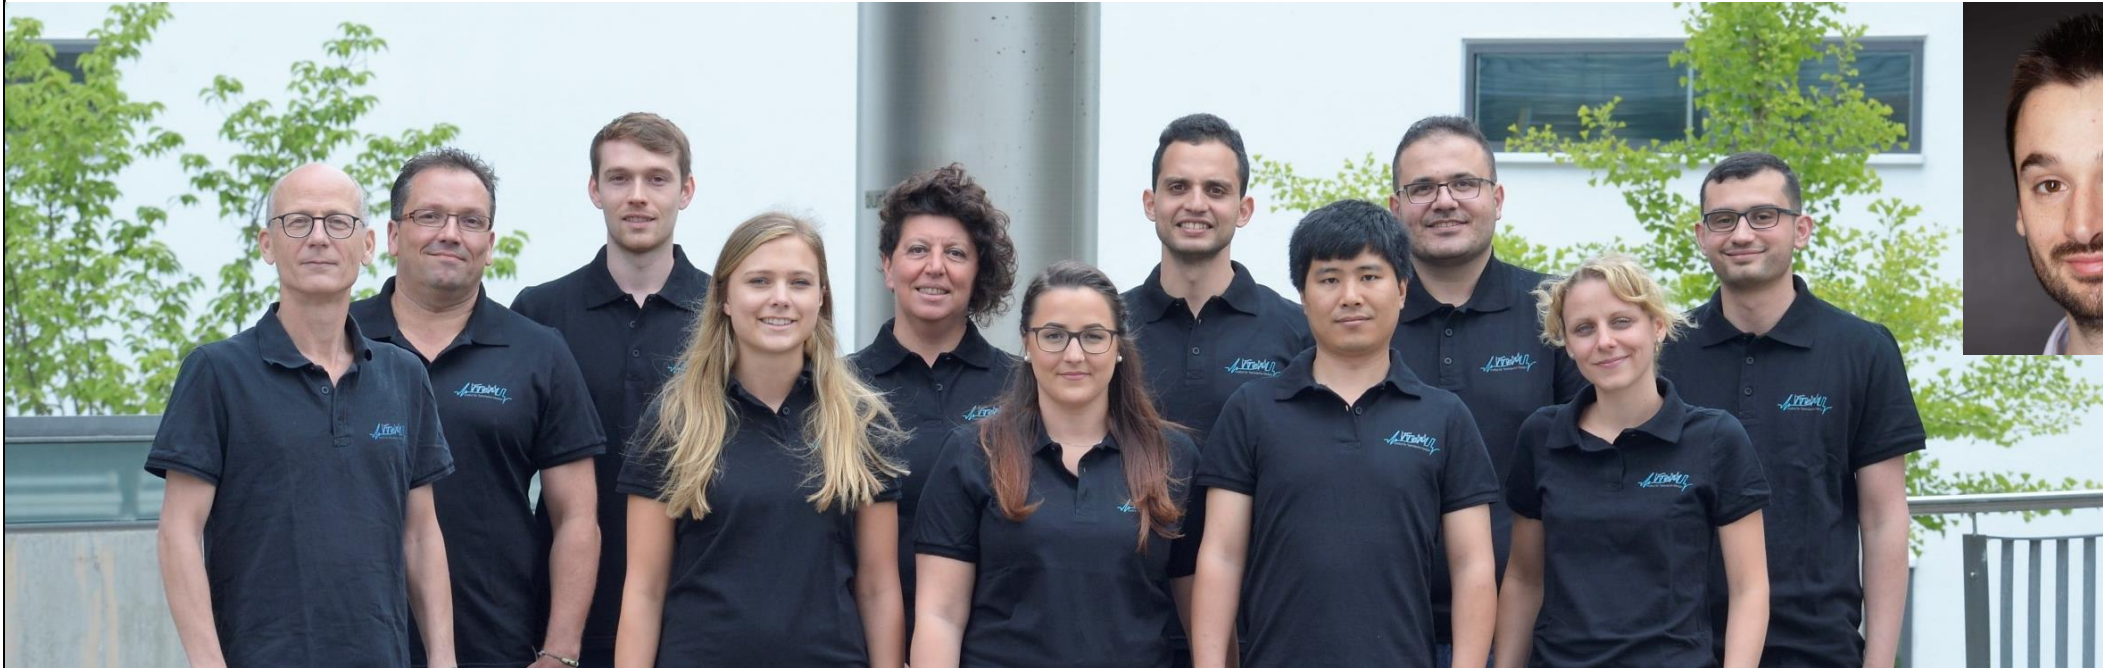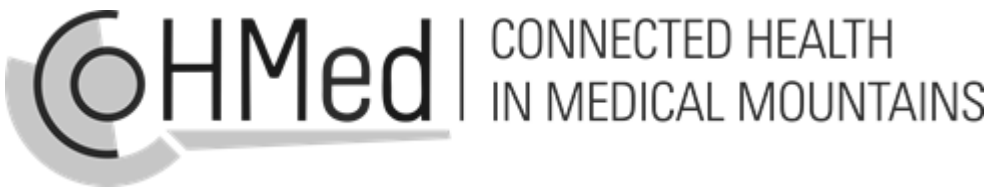

**AIRLobe** funded by “Innovative Projects” MWK-BW.
